# Supplementary material for: Brief communication: Training of AI-based nowcasting models for rainfall early warning should take into account user requirements
Source: Copernicus journal article supplement (doi:10.5194/nhess-25-41-2025), 2025-01-03
Supplement: Supplementary file 1 [file nhess-25-41-2025-supplement.pdf]

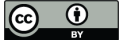

*Supplement of*

**Brief communication: Training of AI-based nowcasting models for rainfall early warning should take into account user requirements**

**Georgy Ayzel and Maik Heistermann**

*Correspondence to:* Maik Heistermann (maik.heistermann@uni-potsdam.de)

The copyright of individual parts of the supplement might differ from the article licence.

# Supplement

## S1 Further details on model specification

### S1.1 RainNet2024

In our study, we employ a common approach that involves utilizing existing deep learning model architectures and transferring them for hypothesis testing in different fields. For this purpose, we use the segmentation models library (Iakubovskii, 2019), which provides a variety of model architectures (e.g., U-Net, LinkNet, PSPNet, FPN), encoder models (various families of neural networks designed for efficient feature extraction, such as those based on VGG, ResNet, and EfficientNet), as well as loss functions and metrics. Despite the proliferation of different model architectures, recent studies in weather forecasting (Andrychowicz et al., 2023; Bodnar et al., 2024) continue to employ U-Net as a primary building block. Therefore, to maintain consistency with RainNet2020 and align with state-of-the-art research, we continue to use the U-Net architecture as the core of RainNet2024. However, unlike RainNet2020 (Ayzel et al., 2020), which utilized a default stack of convolutional layers for feature extraction in the encoder block (referred to as the "backbone" in the segmentation models library), we opted for more sophisticated encoders based on residual neural networks. In our preliminary but extensive benchmarking of different model backbones (results are not shown here), we found that EfficientNetB4 exhibits similar or even superior performance compared to other models based on residual connections (e.g., ResNet34), while introducing significantly fewer model parameters. This aligns with the original findings on EfficientNet performance (Tan and Le, 2019), which have been validated on various datasets for image classification. The choice of the particular version, EfficientNetB4, was justified by the trade-off between model complexity and efficiency. Further exploration of model variants with a higher number of parameters, such as B5 and B6, did not result in significantly improved metrics. Interested readers can find all the details related to the EfficientNet family of models in the original publication Tan and Le (2019).

In RainNet2020, we employed logarithmic transformation of precipitation intensities as a preprocessing step to smooth the data distribution. To mitigate the impact of particularly high values on the loss function, we used the log-cosh function instead of mean squared error. However, during the development of RainNet2024, we discovered that a more straightforward setup with linear scaling as preprocessing and mean squared error as the loss function yielded the best results compared to

more complex approaches. We believe this is primarily due to the EfficientNet-based encoder’s enhanced efficiency in feature  
25 extraction compared to the fully convolutional setup used in RainNet2020.

## **S1.2 RainNet2024-S**

We trained the RainNet2024-S models using the Jaccard loss function, which is a relaxed and differentiable modification of  
the Critical Success Index (CSI). RainNet2024-S predicts, for each grid cell (pixel), the estimated confidence (ranging from 0  
to 1) of exceeding the specified accumulation threshold. For the final binarization (segmentation) of areas where accumulated  
30 precipitation is below or above the threshold, it is necessary to determine a threshold for the confidence value. Although  
the default value is 0.5, this can be optimized numerically to maximize efficiency metrics on a validation dataset. However, as  
demonstrated by Leinonen et al. (2022), using CSI as a loss function can lead to an uncalibrated classification model in terms of  
the comparability between predicted confidence and probability estimates (observation frequency). Consequently, the predicted  
confidence distribution tends to saturate near 0 and 1, making the choice of threshold less critical compared to training with,  
35 for example, binary cross-entropy loss. Therefore, we implement the default threshold value of 0.5 to obtain the segmentation  
mask.

## **S2 Additional skill scores: POD and FAR**

In order to give a more comprehensive view on model performance and inherent trade-offs, we provide additional verification  
metrics in terms of the probability of detection (POD, also known as hit rate) and false alarm rate (FAR) for the different  
40 models and thresholds in Tab. S1 and Tab. S2, respectively. Based on a standard contingency table, POD quantifies the ratio  
between hits and the sum of hits and misses while FAR corresponds to the ratio between false alarms and the sum of false  
alarms and correct negatives. As reported in the main manuscript (section 2.4), ”non-events” (i.e. the sum of false alarms and  
correct negatives) outweigh ”events” (i.e. the sum of hits and misses) by far: depending on the precipitation threshold, the  
relative frequency of ”event” grid cells in the test data amounts to 4.27 % for the threshold of 5 mm in one hour and decreases  
45 further with increasing precipitation thresholds (10 mm: 1.26 %, 15 mm: 0.44 %, 20 mm: 0.19 %, 25 mm: 0.09 %, 30 mm:  
0.04 %, 40 mm: 0.01 %). It should be emphasized that POD and FAR should not be interpreted in isolation since either of  
them can increase/decrease at the cost of the other one. This is why we use the CSI metric as the main verification metric as it  
considers hits, false alarms, and misses.

With regard to POD (the higher the better), the RainNet2024-S models outperform all competitors for thresholds  $\leq 20$  mm/h.  
50 For larger thresholds, persistence is the superior model in terms of POD. RainNet2024 rates second best up to a threshold of  
10 mm only. With regard to FAR (the lower the better), RainNet2024-S is superior only for a threshold of 5 mm/h. For higher  
thresholds, RainNet2024 takes over the lead while RainNet2024-S rates second best. Altogether, the results for POD and FAR  
suggest that the RainNet2024-S models learned to preserve areas of high intensity, but have a tendency of misplacing them (due  
to the low frequency of event grid cells) while RainNet2024 tends to underpredict high rainfall accumulations ( $\geq 15$  mm/a)  
55 anyway. As expected, Persistence scores in terms of POD for high thresholds, but always at the cost of very poor FAR values.

**Table S1.** Hit rate (also known as probability of detection, POD) for the different investigated precipitation accumulation thresholds and models (RainNet2020 is excluded due to its obviously low performance).

| Threshold (mm/h) | Persistence | PySteps | RainNet2024 | RainNet2024-S |
|------------------|-------------|---------|-------------|---------------|
| 5                | 0.357       | 0.421   | 0.487       | 0.551         |
| 10               | 0.249       | 0.255   | 0.261       | 0.372         |
| 15               | 0.208       | 0.166   | 0.131       | 0.271         |
| 20               | 0.182       | 0.108   | 0.057       | 0.282         |
| 25               | 0.163       | 0.072   | 0.023       | 0.144         |
| 30               | 0.152       | 0.051   | 0.011       | 0.128         |
| 40               | 0.130       | 0.027   | 0.004       | 0.096         |

**Table S2.** False alarm rate (FAR) for the different investigated precipitation accumulation thresholds and models (RainNet2020 is excluded due to its obviously low performance).

| Threshold (mm/h) | Persistence | PySteps | RainNet2024 | RainNet2024-S |
|------------------|-------------|---------|-------------|---------------|
| 5                | 0.639       | 0.535   | 0.446       | 0.398         |
| 10               | 0.815       | 0.744   | 0.535       | 0.548         |
| 15               | 0.897       | 0.855   | 0.601       | 0.660         |
| 20               | 0.939       | 0.917   | 0.649       | 0.809         |
| 25               | 0.962       | 0.950   | 0.694       | 0.775         |
| 30               | 0.974       | 0.968   | 0.732       | 0.899         |
| 40               | 0.985       | 0.987   | 0.858       | 0.951         |

### S3 Confidence intervals for CSI metric

For Fig. 2 of the main manuscript, we confirmed that the shown mean CSI for all combinations of models and thresholds were significantly different (except for Persistence and PySteps at a threshold of 20 mm/h). The evaluation of significance was based on the 90 % confidence intervals of the mean CSI values (as shown in Tab. S3). These confidence intervals were obtained by means of bootstrapping (or resampling) for each combination of model and threshold, based on the following procedure:

- we computed the  $CSI_i$  on each test dataset  $i$ ;
- from these  $CSI_i$ , we randomly sampled 1000 values (with replacement), and computed the mean  $\overline{CSI}_j$  from this sample;
- the previous step was repeated 100 times;
- finally, we obtained the 5th and the 95th percentiles ( $P_5$ ,  $P_{95}$ ) as the boundaries of the confidence interval from all 100 realisations of  $\overline{CSI}_j$ .

**Table S3.** Mean CSI on test dataset and corresponding 90 % confidence interval ( $P_5$  and  $P_{95}$  correspond to 5th and 95th percentile).

| Model         | Threshold (mm/h) | Mean  | $P_5$ | $P_{95}$ |
|---------------|------------------|-------|-------|----------|
| Persistence   | 5                | 0.215 | 0.214 | 0.217    |
|               | 10               | 0.113 | 0.112 | 0.114    |
|               | 15               | 0.069 | 0.068 | 0.070    |
|               | 20               | 0.044 | 0.043 | 0.045    |
|               | 25               | 0.030 | 0.029 | 0.030    |
|               | 30               | 0.021 | 0.021 | 0.022    |
|               | 40               | 0.012 | 0.012 | 0.013    |
| PySteps       | 5                | 0.285 | 0.283 | 0.287    |
|               | 10               | 0.142 | 0.140 | 0.143    |
|               | 15               | 0.077 | 0.076 | 0.078    |
|               | 20               | 0.042 | 0.041 | 0.043    |
|               | 25               | 0.023 | 0.023 | 0.024    |
|               | 30               | 0.014 | 0.013 | 0.015    |
|               | 40               | 0.005 | 0.005 | 0.005    |
| RainNet2020   | 5                | 0.205 | 0.202 | 0.207    |
|               | 10               | 0.028 | 0.026 | 0.028    |
|               | 15               | 0.000 | 0.000 | 0.000    |
|               | 20               | 0.000 | 0.000 | 0.000    |
|               | 25               | 0.000 | 0.000 | 0.000    |
|               | 30               | 0.000 | 0.000 | 0.000    |
|               | 40               | 0.000 | 0.000 | 0.000    |
| RainNet2024   | 5                | 0.340 | 0.338 | 0.342    |
|               | 10               | 0.182 | 0.180 | 0.184    |
|               | 15               | 0.094 | 0.092 | 0.096    |
|               | 20               | 0.042 | 0.041 | 0.043    |
|               | 25               | 0.016 | 0.016 | 0.017    |
|               | 30               | 0.006 | 0.006 | 0.007    |
|               | 40               | 0.001 | 0.001 | 0.001    |
| RainNet2024-S | 5                | 0.402 | 0.400 | 0.404    |
|               | 10               | 0.246 | 0.243 | 0.248    |
|               | 15               | 0.160 | 0.158 | 0.163    |
|               | 20               | 0.113 | 0.111 | 0.115    |
|               | 25               | 0.076 | 0.074 | 0.078    |
|               | 30               | 0.043 | 0.041 | 0.044    |
|               | 40               | 0.021 | 0.020 | 0.021    |

## References

- Andrychowicz, M., Espeholt, L., Li, D., Merchant, S., Merose, A., Zyda, F., Agrawal, S., and Kalchbrenner, N.: Deep learning for day forecasts from sparse observations, arXiv preprint arXiv:2306.06079, 2023.
- 70 Ayzel, G., Scheffer, T., and Heistermann, M.: RainNet v1.0: a convolutional neural network for radar-based precipitation nowcasting, *Geoscientific Model Development*, 13, 2631–2644, <https://doi.org/10.5194/gmd-13-2631-2020>, 2020.
- Bodnar, C., Bruinsma, W. P., Lucic, A., Stanley, M., Brandstetter, J., Garvan, P., Riechert, M., Weyn, J., Dong, H., Vaughan, A., et al.: Aurora: A foundation model of the atmosphere, arXiv preprint arXiv:2405.13063, 2024.
- Iakubovskii, P.: Segmentation Models, [https://github.com/qubvel/segmentation\\_models](https://github.com/qubvel/segmentation_models), 2019.
- 75 Leinonen, J., Hamann, U., and Germann, U.: Seamless lightning nowcasting with recurrent-convolutional deep learning, *Artificial Intelligence for the Earth Systems*, 1, e220043, 2022.
- Tan, M. and Le, Q.: Efficientnet: Rethinking model scaling for convolutional neural networks, in: International conference on machine learning, pp. 6105–6114, PMLR, 2019.
